# Supplementary material for: One-pot alkaline vapor oxidation synthesis and electrocatalytic activity towards glucose oxidation of CuO nanobelt arrays
Source: Royal Society of Chemistry journal article supplement (doi:10.1039/c1ra00109d), 2011-01-01
Supplement: c1ra00109d.pdf [file c1ra00109d.pdf]

## Supplementary Information

# One-Pot Alkaline Vapor Oxidation Synthesis and Electrocatalytic Activity towards Glucose Oxidation of CuO Nanobelt Arrays

Tetsuro Soejima,<sup>\*a,b</sup> Hitomi Yagyū,<sup>a</sup> Nobuo Kimizuka,<sup>b,c</sup> and Seishiro Ito<sup>a</sup>

<sup>a</sup> Department of Applied Chemistry, School of Science and Engineering, Kinki University,

3-4-1 Kowakae, Higashi-osaka, Osaka 577-8502, Japan.

<sup>b</sup> CREST, Japan Science and Technology Agency, 744 Moto-oka, Nishi-ku, Fukuoka 819-0395, Japan.

<sup>c</sup> Department of Chemistry and Biochemistry, Graduate School of Engineering, Kyushu University,

744 Moto-oka, Nishi-ku, Fukuoka 819-0395, Japan.

\*E-mail: soejima@apch.kindai.ac.jp

### Experimental details

#### *Characterization.*

Field-emission scanning electron microscopy (SEM) was performed using Hitachi S-4800 type II (accelerating voltage, 10 kV). X-ray diffraction (XRD) was performed using Rigaku RINT 2500 using Cu K $\alpha$  radiation. ICP-AES measurement was performed using SHIMADZU ICP-7500.

#### *Electrochemical Measurements.*

Electrochemical measurements were performed on an HZ-5000 with HAG-1512m (HOKUTO DENKO). All electrochemical experiments were carried out using a conventional three-electrode system consisting of an Ag/AgCl (saturated KCl) reference electrode, a platinum wire counter electrode, and a CuO nanobelt arrays/Cu electrode (formation conditions; 100 mM NH<sub>3</sub>–100 mM H<sub>2</sub>O<sub>2</sub> aqueous solution, 80 °C, 7h). A 0.5 mol L<sup>-1</sup> NaOH aqueous solution was used as the supporting electrolyte. The electrolyte was stirring during the electrochemical measurement using a magnetic stirrer and a stirring bar.

**Fig. S1**

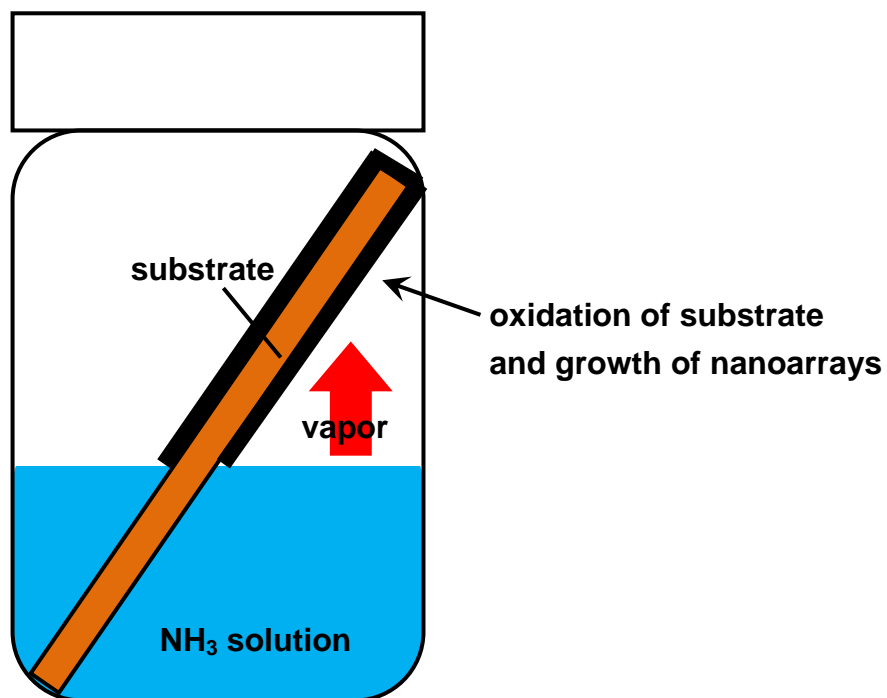

**Fig. S1** The schematic illustration of a vapor oxidation (VO) growth process.

**Fig. S2**

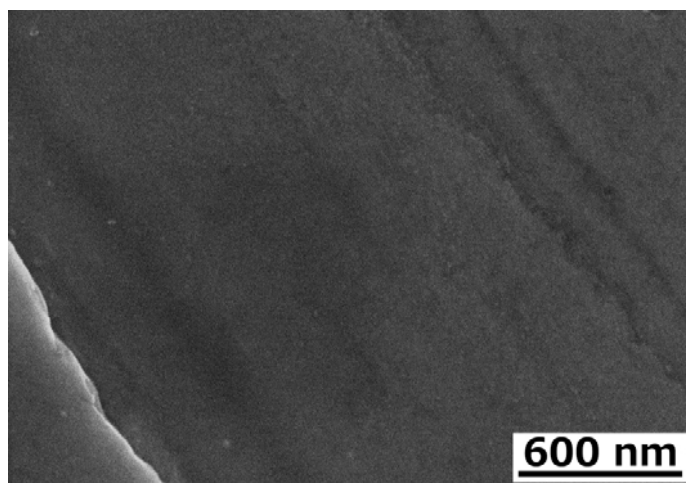

**Fig. S2** An SEM image of Cu plate before the VO reaction.

**Fig. S3**

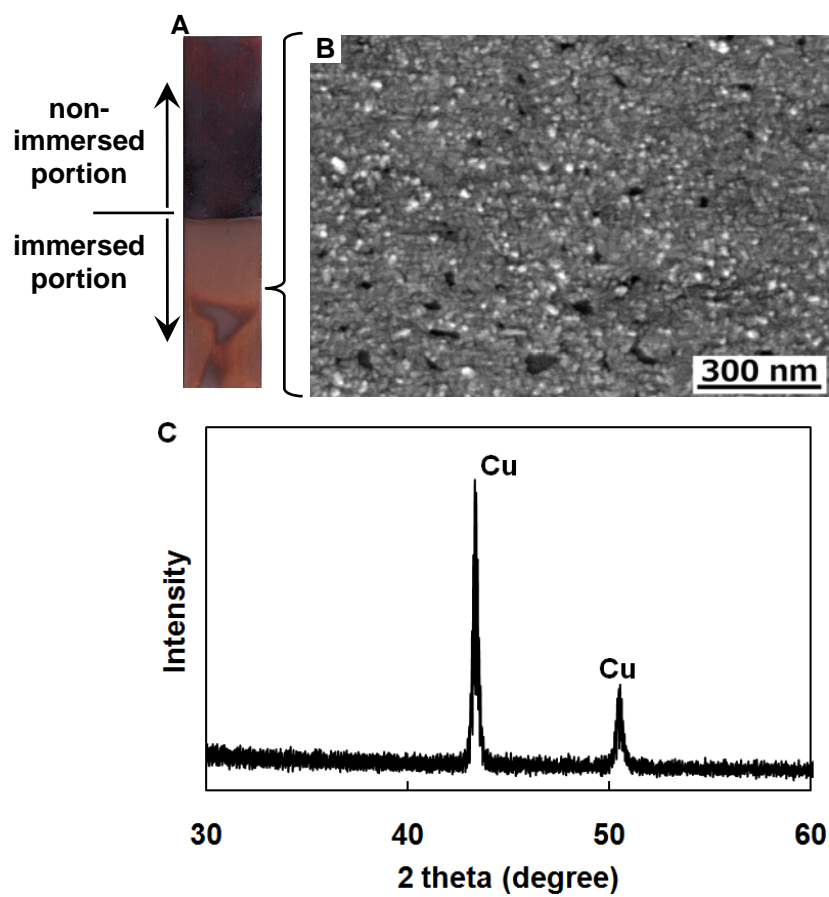

**Fig. S3** (A) A Picture of a Cu plate after the VO reaction (100 mM  $\text{NH}_3$ –100 mM  $\text{H}_2\text{O}_2$  aqueous solution). An SEM image (B) and XRD pattern (C) of Cu plate at the immersed portion.

**Fig. S4**

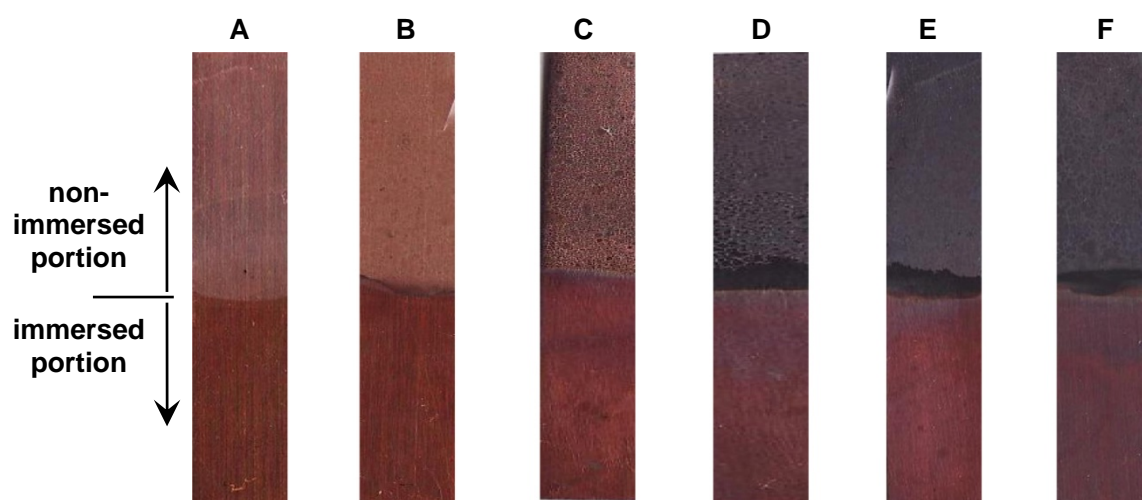

**Fig. S4** Pictures of Cu substrates after the VO reaction: (A), 10min; (B), 30min; (C), 1h; (D), 3h; (E), 7h; (F), 10h.

100 mM  $\text{NH}_3$ -100 mM  $\text{H}_2\text{O}_2$  aqueous solution (19 mL); reaction temperature, 80 °C.

**Fig. S5**

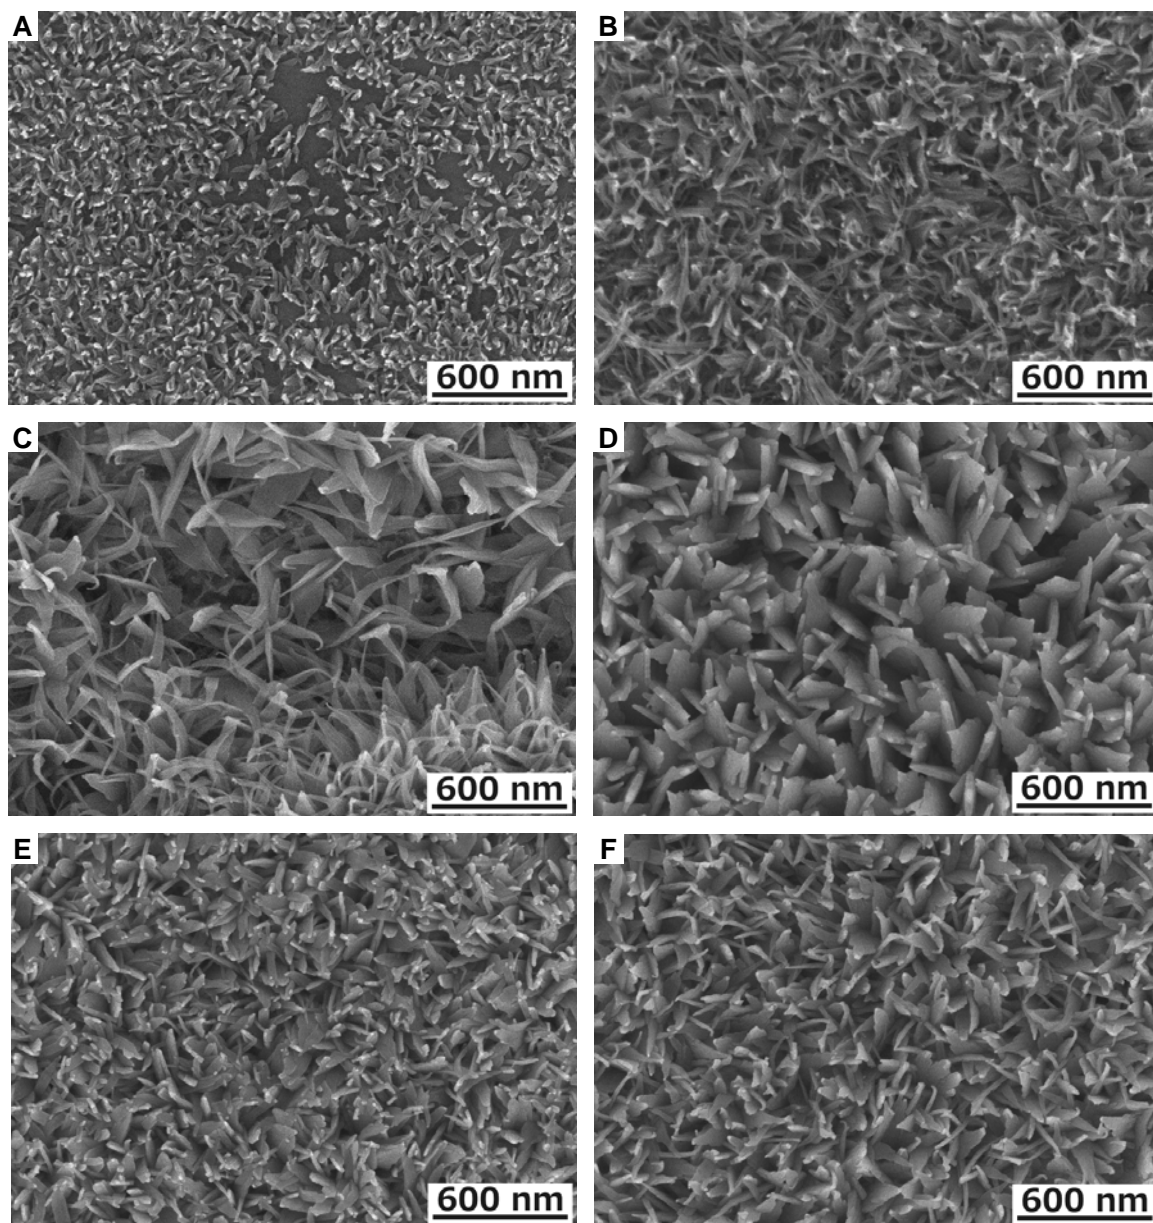

**Fig. S5** SEM images of CuO nanobelt arrays obtained at varied reaction periods: (A), 10min; (B), 30min; (C), 1h; (D), 3h; (E), 7h; (F), 10h. 100 mM  $\text{NH}_3$ -100 mM  $\text{H}_2\text{O}_2$  aqueous solution (19 mL); reaction temperature, 80 °C.

Fig. S6

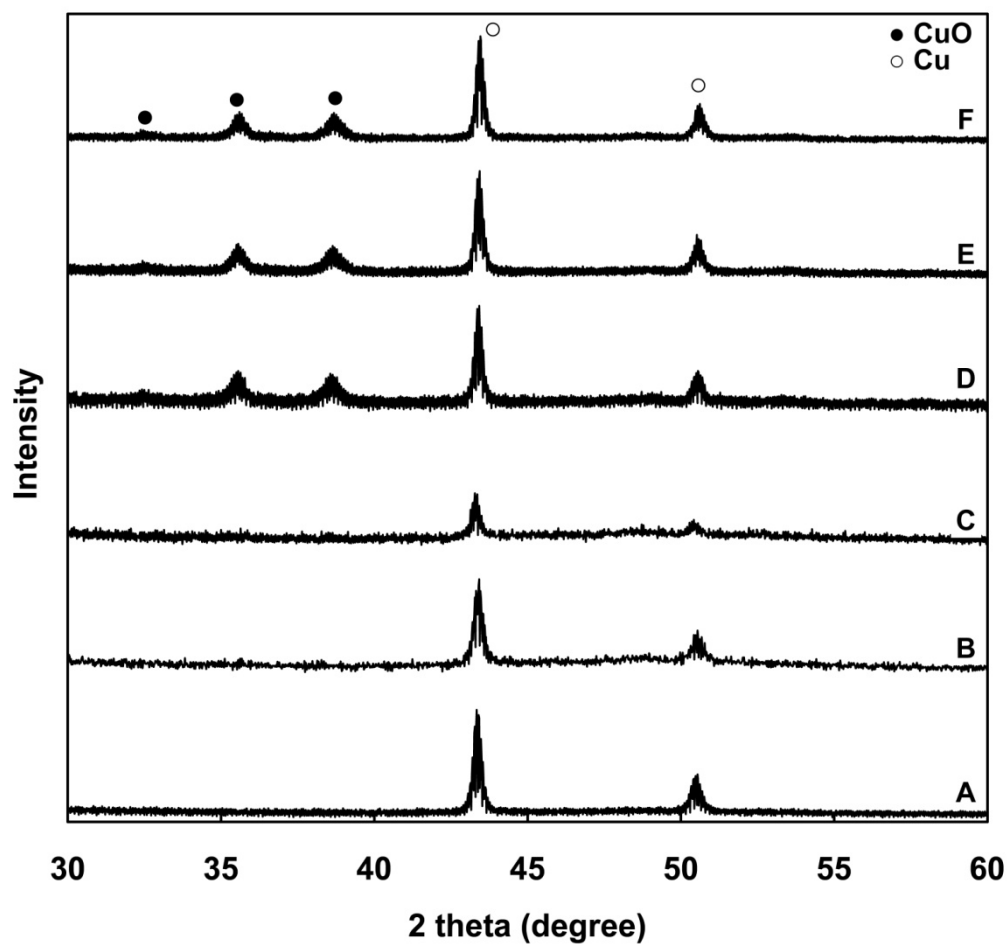

**Fig. S6** XRD patterns of CuO nanobelts obtained at varied reaction periods: (A), 10min; (B), 30min; (C), 1h; (D), 3h; (E), 7h; (F), 10h. 100 mM  $\text{NH}_3$ –100 mM  $\text{H}_2\text{O}_2$  aqueous solution (19 mL); reaction temperature, 80 °C.

**Fig. S7**

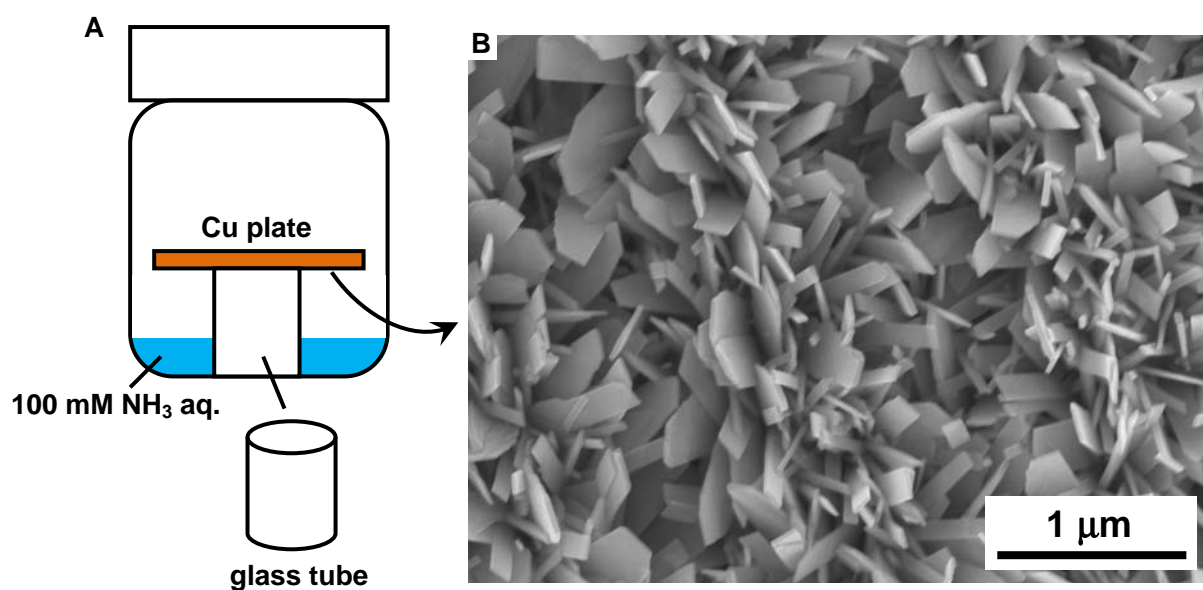

**Fig. S7** (A) A schematic illustration of a VO process. (B) An SEM image of Cu nanobelt arrays formed by the vapor oxidation process.



**Fig. S8**

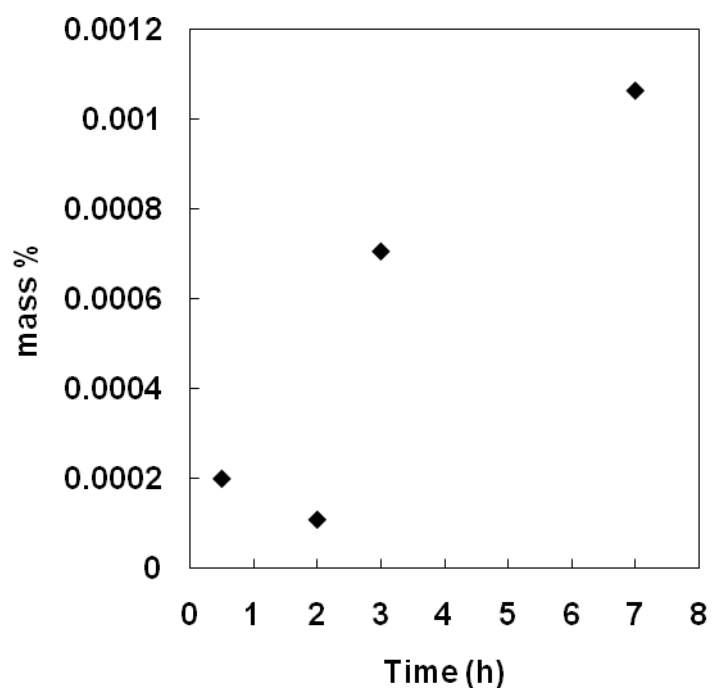

**Fig. S8** Time courses of the amount of copper in the  $\text{NH}_3/\text{H}_2\text{O}_2$  aqueous solution after the VO reaction.

**Fig. S9**

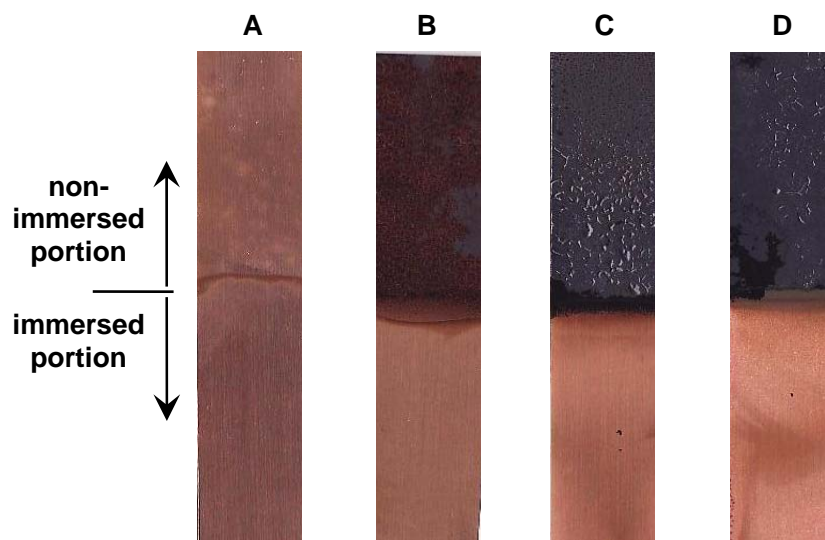

**Fig. S9** Pictures of Cu substrates after the VO reaction: (A), 10min; (B), 1h; (C), 5h; (D), 24h. 100 mM  $\text{NH}_3$  aqueous solution (19 mL); reaction temperature, 80 °C.

**Fig. S10**

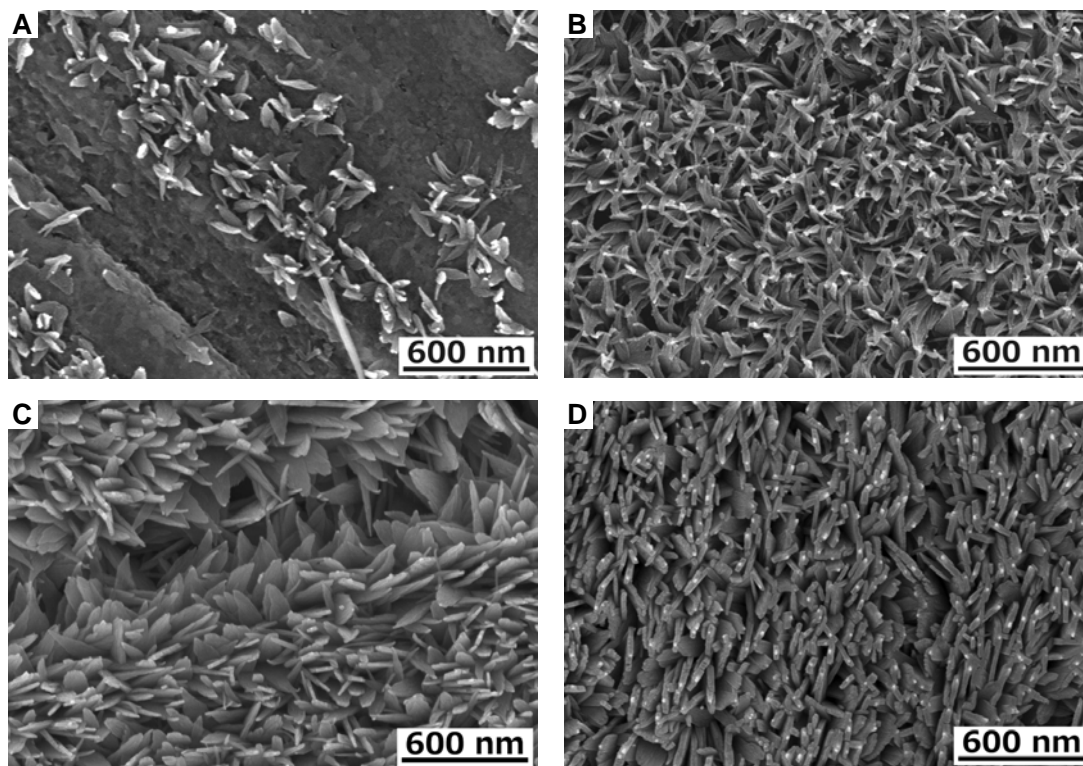

**Fig. S10** SEM images of CuO nanobelt arrays obtained at varied reaction periods: (A), 10min; (B), 1h; (C), 5h; (D), 24h. 100 mM  $\text{NH}_3$  aqueous solution (19 mL); reaction temperature, 80 °C.

**Fig. S11**

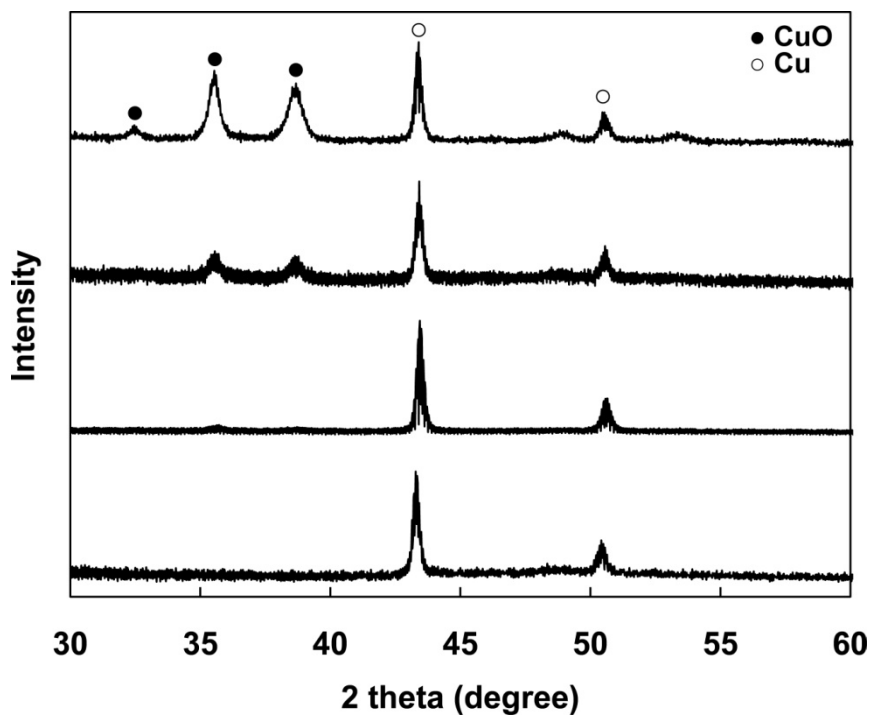

**Fig. S11** XRD patterns of CuO nanobelt arrays obtained at varied reaction periods: (A), 10min; (B), 1h; (C), 5h; (D), 24h. 100 mM  $\text{NH}_3$  aqueous solution (19 mL); reaction temperature, 80 °C.

**Fig. S12**

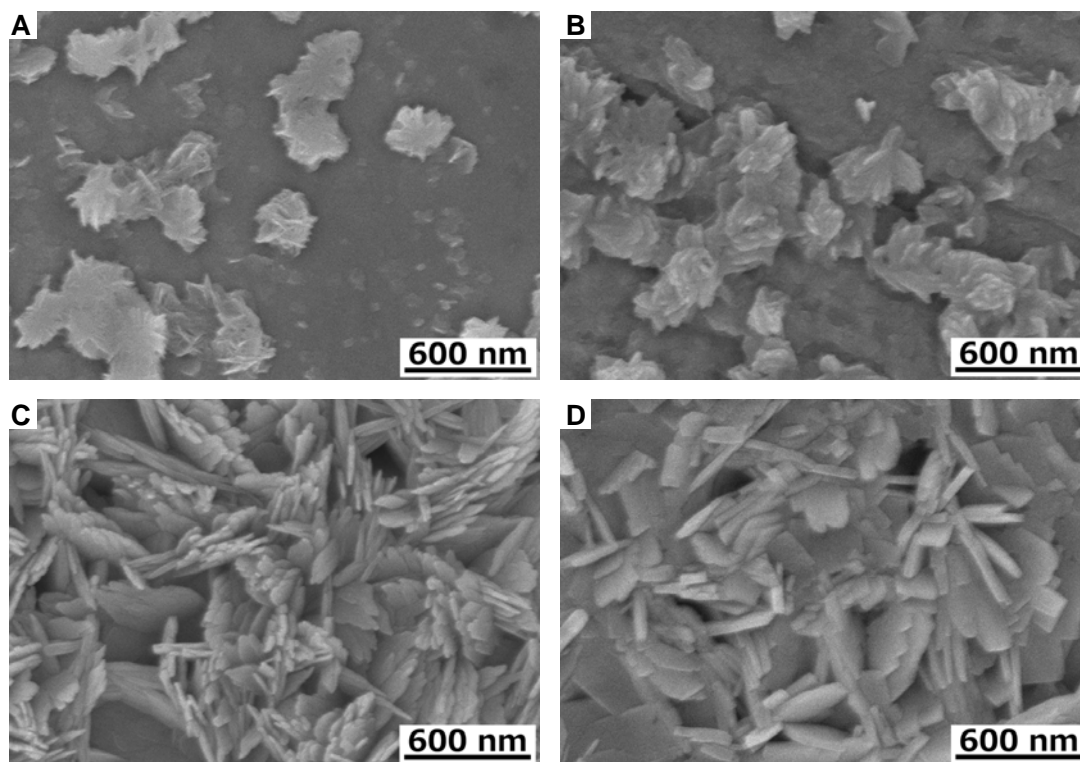

**Fig. S12** SEM images of Cu plate after the VO reaction at varied pH: (A), pH 2; (B), pH 8; (C), pH 10; (D), pH 13.

100 mM  $\text{NH}_3$  aqueous solution (19 mL); reaction temperature, 80 °C.

**Fig. S13**

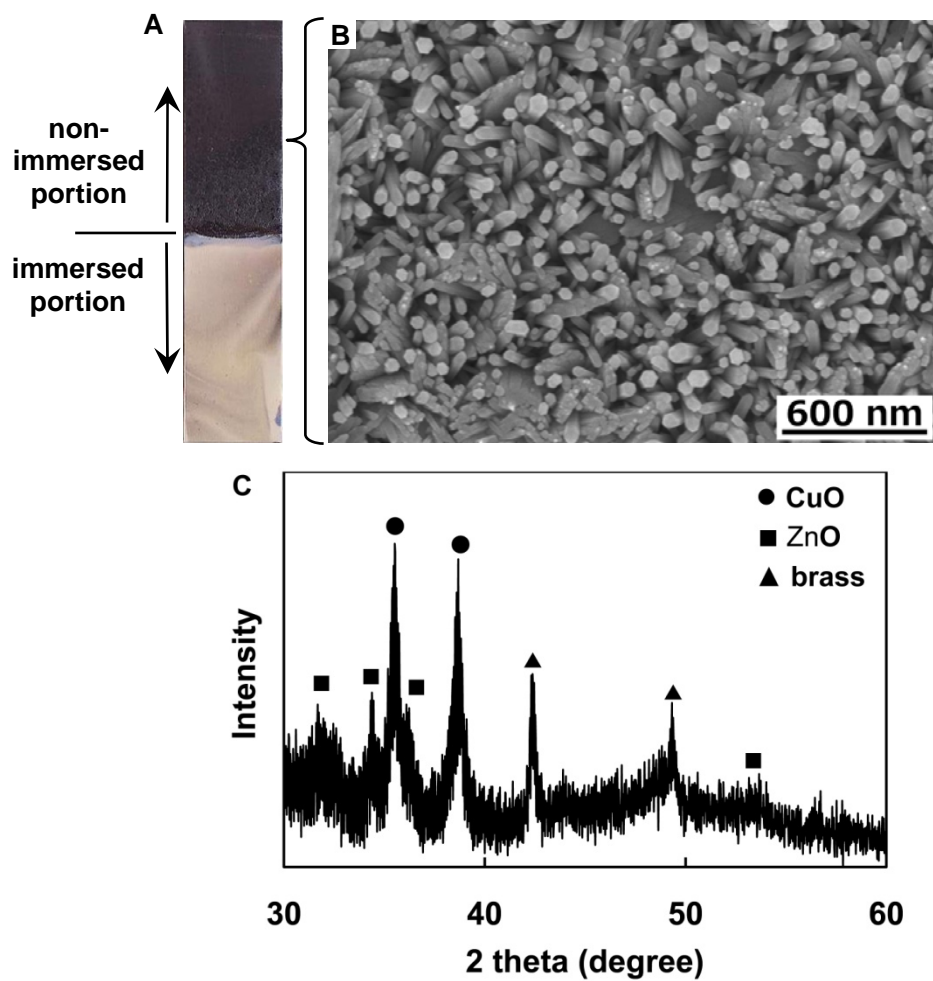

**Fig. S13** (A) A Picture of a brass plate after the VO reaction (100 mM  $\text{NH}_3$  aqueous solution, 24 h). A SEM image (B) and XRD pattern (C) of CuO/ZnO composite nanoarrays formed on brass plate.

**Fig. S14**

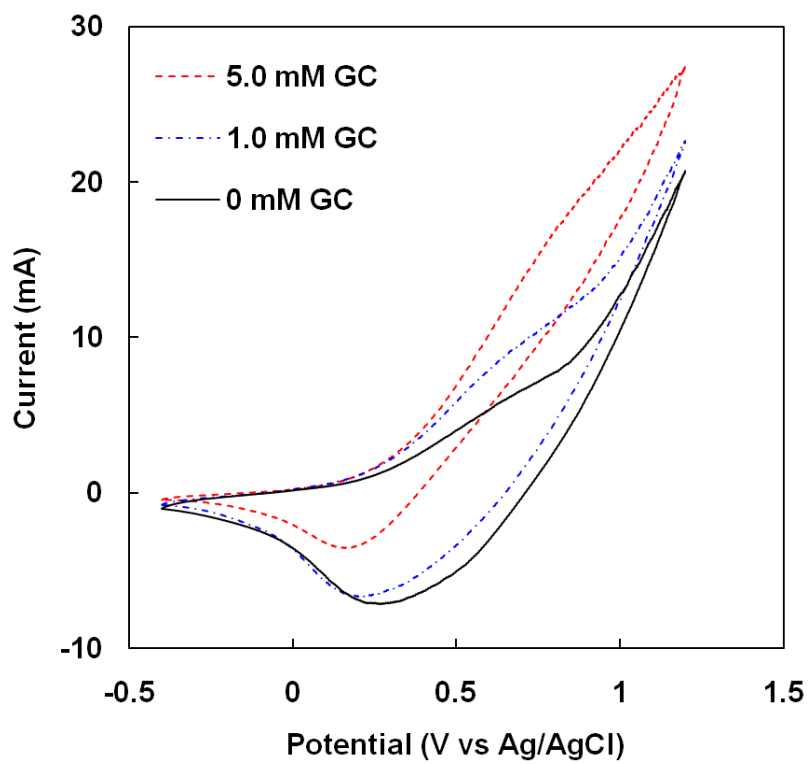

**Fig. S14** Cyclic voltammograms (CVs) of glucose in 0.5 mol L<sup>-1</sup> NaOH. The scan rate is 10 mV s<sup>-1</sup>.

## Table S1

**Table S1.** Comparison of analytical performance of the present CuO nanobelt/Cu sensor with other reported non-enzymatic glucose sensors

| Electrode type                                                                       | Sensitivity ( $\mu\text{A mM}^{-1}$<br>or $\mu\text{A mM}^{-1} \text{cm}^{-2}$ ) | Detection limit ( $\mu\text{M}$ ) |
|--------------------------------------------------------------------------------------|----------------------------------------------------------------------------------|-----------------------------------|
| Pt nanotube array electrode <sup>1</sup>                                             | 0.1                                                                              | 1.0                               |
| Mesoporous Pt electrode <sup>2</sup>                                                 | 9.6                                                                              | N/A                               |
| Electrode based on bimetallic PtM (M = Ru, Pd, and Au)-CNT-ionic liquid <sup>3</sup> | 10.7                                                                             | 50.0                              |
| Porous Au electrode <sup>4</sup>                                                     | 11.8                                                                             | 5.0                               |
| Pt-Pb nanoparticles deposited on MWCNTs <sup>5</sup>                                 | 17.8                                                                             | 1.8                               |
| Macroporous Pt electrode <sup>6</sup>                                                | 31.3                                                                             | 0.1                               |
| 3-D gold film electrode <sup>7</sup>                                                 | 46.6                                                                             | 3.2                               |
| Gold nanoparticles electrode <sup>8</sup>                                            | 179.0                                                                            | 0.05                              |
| Cu nanocluster/MWCNTs/GC electrode <sup>9</sup>                                      | 253.0                                                                            | 0.21                              |
| Gold nanowire array electrode <sup>10</sup>                                          | 309.0                                                                            | 50.0                              |
| CuO nanorods-graphite electrode <sup>11</sup>                                        | 371.4                                                                            | 4.0                               |
| CuO nanospheres electrode <sup>12</sup>                                              | 404.5                                                                            | 1.0                               |
| Ni-carbon nanofiber paste electrode <sup>13</sup>                                    | 420.4                                                                            | 1.0                               |
| CuO nanofiber electrode <sup>14</sup>                                                | 431.3                                                                            | 0.8                               |
| CuO nanowire modified Cu electrode <sup>15</sup>                                     | 490.0                                                                            | 0.049                             |
| CuO nanowalls/Cu electrode <sup>16</sup>                                             | 556.3                                                                            | 0.05                              |
| CuO nanobelts/Cu electrode (This work)                                               | 582.0                                                                            | <1.0                              |
| Self-assembled CNT thin films with Cu nanoparticles electrode <sup>17</sup>          | 602.0                                                                            | 0.1                               |
| CuO nanoflowers-graphite electrode <sup>11</sup>                                     | 709.5                                                                            | 4.0                               |
| Ni nanowire array electrode <sup>18</sup>                                            | 1043                                                                             | 0.1                               |
| Cu <sub>x</sub> O nanoflower/Cu electrode <sup>19</sup>                              | 1620                                                                             | 0.049                             |
| CuO-MWCNTs array electrode <sup>20</sup>                                             | 2190                                                                             | 0.8                               |

## References

1. J. H. Yuan, K. Wang, X. H. Xia, *Adv. Funct. Mater.*, 2005, **15**, 803-809.
2. S. Park, T. D. Chung, H. C. Kim, *Anal. Chem.*, 2003, **75**, 3046-3049.
3. F. Xiao, F. Q. Zhao, D. P. Mei, Z. R. Mo, B. Z. Zeng, *Biosens. Bioelectron.*, 2009, **24**, 3481-3486.
4. Y. Li, Y. Y. Song, C. Yang, X. H. Xia, *Electrochem. Commun.*, 2007, **9**, 981-988.
5. H. F. Cui, J. S. Ye, W. D. Zhang, C. M. Li, J. H. T. Luong, F. S. Sheu, *Anal. Chim. Acta*, 2007, **594**, 175-183.



6. Y. Y. Song, D. Zhang, W. Gao, X. H. Xia, *Chem. Eur. J.*, 2005, **11**, 2177-2182.
7. Y. Bai, W. W. Yang, Y. Sun, C. Q. Sun, *Sens. Actuators B*, 2008, **134**, 471-476.
8. B. K. Jena, C. R. Raj, *Chem. Eur. J.*, 2006, **12**, 2702-2708.
9. X. H. Kang, Z. B. Mai, X. Y. Zou, P. X. Cai, J. Y. Mo, *Anal. Biochem.*, 2007, **363**, 143-150.
10. S. Cherevko, C. H. Chung, *Sens. Actuators B*, 2009, **142**, 216-223.
11. X. Wang, C. Hu, H. Liu, G. Du, X. He, Y. Xi, *Sens. Actuators B*, 2009, **144**, p. 220-225.
12. E. Reitz, W. Z. Jia, M. Gentile, Y. Wang, Y. Lei, *Electroanalysis*, 2008, **20**, 2482-2486.
13. Y. Liu, H. Teng, H. Q. Hou, T. Y. You, *Biosens. Bioelectron.*, 2009, **24**, 3329-3334.
14. W. Wang, L. Zhang, S. Tong, X. Li, W. Song, *Biosens. Bioelectron.*, 2009, **25**, 708-714.
15. Z. Zhuang, X. Su, H. Yuan, Q. Sun, D. Xiao, M. M. F. Choi, *Analyst*, 2008, **133**, 126-132.
16. Z. Zhang, A. Gu, G. Wang, Y. Wei, W. Wang, H. Wu, B. Fang, *CrystEngComm*, 2010, **12**, 1120-1126.
17. X. Li, Q. Y. Zhu, S. F. Tong, W. Wang, W. B. Song, *Sens. Actuators B*, 2009, **136**, 444-450.
18. L. M. Lu, L. Zhang, F. L. Qu, H. X. Lu, X. B. Zhang, Z. S. Wu, S. Y. Huan, Q. A. Wang, G. L. Shen, R. Q. Yu, *Biosens. Bioelectron.*, 2009, **25**, 218-223.
19. C. Li, Y. Su, S. Zhang, X. Lv, H. Xia, Y. Wang, *Biosens. Bioelectron.*, 2010, **26**, 903-907.
20. J. Yanga, L.-C. Jiang, W.-D. Zhang, S. Gunasekaran, *Talanta*, 2010, **82**, 25-33.
